# Supplementary material for: Structures and reactivity of synthetic zinc(ii) complexes resembling the active sites and reaction intermediates of aminopeptidasesElectronic supplementary information (ESI) available: Experimental details (synthesis, characterization and hydrolysis studies). See http://www.rsc.org/suppdata/cc/b3/b314089j/
Source: Royal Society of Chemistry journal article supplement (doi:10.1039/b314089j), 2004-01-01
Supplement: b314089j.doc [file b314089j.doc]

**Electronic Supplementary Information (ESI)**

**Structures and reactivity of synthetic zinc(II) complexes resembling the active sites and reaction intermediates of aminopeptidases**

Juan C. Mareque Rivas*, Emiliano Salvagni and Simon Parsons

*School of Chemistry, The University of Edinburgh,*

*Joseph Black Building, King's Buildings,*

*West Mains Road, Edinburgh, EH9 3JJ, UK*

*Tel:44-(0)131-650-4761*

*Fax:44-(0)131-650-4743*

***To whom correspondence should be addressed. Email:juan.mareque@ed.ac.uk.

**Experimental Section**

**General.** Reagents were obtained from commercial sources and used as received unless otherwise noted. Solvents were dried and purified under N2 by using standard methods1 and were distilled immediately before use. Buffer solutions of HEPES (2-(4-(2-hydroxyethyl)-1-piperazinyl)ethanesulfonic acid, (50mM in H2O) pH 7.0 were used for the hydrolysis studies. All compounds were prepared under N2 unless otherwise mentioned. 1-Methyl-4-(-6-amino-2-pyridinylmethyl)-piperazine (L) was synthesized according to a recently reported procedure.2 The NMR spectra were obtained using a Bruker DPX 360 at 20 C in D2O unless otherwise noted. 13Cand 1H chemical shifts are referenced with respect to the carbon (C 0 ppm) and proton resonances (H 0.00 ppm) of TSP (external standard). Mass spectra were performed on a micromass Platform II system operating in Flow Injection Analysis mode with the electrospray method. Elemental analyses were carried out by the microanalyses service provided by the School of Chemistry at the University of Edinburgh.

**Synthesis.**

**[((LH+)2Zn2(Gly-Gly)2](ClO4)4(H2O)2 1(ClO4)4(H2O)2** Zn(ClO4) 26H2O (74.5 mg, 0.2 mmol) and 1-methyl-4-(-6-amino-2-pyridinylmethyl)-piperazine (**L**)(41.3 mg, 0.2 mmol) were dissolved in MeOH (10 mL). After 10 min, glycylglycine (26.4 mg, 0.2 mmol) was added and the reaction mixture was stirred at room temperature until a white cloudy solution was formed (ca. 1h). The precipitate was isolated by centrifugation and dried under vacuum to afford the pure compound as a white solid (115 mg, 95%) (Found: C, 29.25; H, 4.34; N, 13.27. Calc. for C30H54Cl4N12O24Zn2: C, 29.07; H, 4.39; N, 13.56).

1H NMR (D2O, 360.1 MHz, 293 K) δH (ppm) 7.60 (dd, J = 8.3 and 7.2 Hz, 1H, py’-*H4*), 6.74 and 6.69 (d, J = 7.2 Hz, 1H and d, J = 8.3 Hz, 1H; py’-*H3* and py’-*H5*), 3.87 and 3.65 (s, 2H and 2H, C*H2* (Gly-Gly)), 3.74 (s, 2H, NC*H2*-py'), 3.23 and 2.9 (br.s., 4H and 4H, N(C*H2*C*H2*)2N-CH3) and 2.78 (s, 3H, N(CH2CH2)2N-C*H3*). 13C NMR (D2O, 90.5 MHz, 293 K) δC (ppm); 179.4 and 176.4 (*C*=O (Gly-Gly)), 161.3 and 153.1 (py’-*C2* and py’-*C6*), 143.7 (py’-*C3*), 116.7 and 113.6 (py'-*C4* and py'-*C5*), 64.1 (N*C*H2-py’), 54.9 and 52.7 (N(*C*H2*C*H2)2N-CH3), 45.9 (N(*C*H2*C*H2)2N-*C*H3), 46.4 and 43.4 (*C*H2 (Gly-Gly)). ESI-MS (+ ion) Found 401.0, Calcd. for [(L)Zn(Gly-Gly)]+ 401.1 (100%), and matches theoretical isotope distribution.

**[((LH+)Zn(Gly)](ClO4)2 2.** Zn(ClO4) 26H2O (74.5 mg, 0.2 mmol) and 1-methyl-4-(-6-amino-2-pyridinylmethyl)-piperazine (**L**)(41.3 mg, 0.2 mmol) were dissolved in MeOH (10 mL). After 10 min glycine (15 mg, 0.2 mmol) was added and the reaction mixture was left stirring at room temperature until a white cloudy solution was formed (ca. 1h). The precipitate was isolated by centrifugation and dried under vacuum to afford the pure compound as a white solid (100 mg, 92%) (Found: C, 28.62; H, 4.21; N, 12.71. Calc. for C13H23Cl2N5O10Zn: C, 28.62; H, 4.25; N, 12.84).

1H NMR (D2O, 360.1 MHz, 293 K) δH (ppm) 7.62 (t, J = 7.6 Hz, 1H, py’-*H4*), 6.78 and 6.70 (d, J = 7.2 Hz, 1H and d, J = 8.3 Hz, 1H; py’-*H3* and py’-*H5*), 3.71 (s, 2H, NC*H2*-py'), 3.37 (s, 2H, C*H2* (Gly)), 3.21 and 2.9 (br.s., 4H and 4H, N(C*H2*C*H2*)2N-CH3) and 2.79 (s, 3H, N(CH2CH2)2N-C*H3*). 13C NMR (D2O, 90.5 MHz, 293 K) δC (ppm); 181.4 (*C*=O (Gly)), 161.2 and 153.9 (py’-*C2* and py’-*C6*), 143.2 (py’-*C3*), 117.1 and 113.1 (py'-*C4* and py'-*C5*), 63.4 (N*C*H2-py’), 55.1 and 52.6 (N(*C*H2*C*H2)2N-CH3), 45.8 (N(*C*H2*C*H2)2N-*C*H3), 44.6 (*C*H2 (Gly)). ESI-MS (+ ion) Found 343.9, Calcd. for [(L)Zn(Gly)]+ 344.10 (100%), and matches theoretical isotope distribution.

**Hydrolysis Studies**

NMR tubes containing **1**·(ClO4)4·2H2O or Gly-Gly (as control)in D2O (25 mM) were incubated at 70 ºC and pH 7.0 ± 0.1. Solutions were evaporated to dryness under vacuum, D2O (0.6 cm3) was added and the 1H NMR spectra were recorded after 1, 3 and 5 days. This procedure, introducing D2O after incubation at elevated temperatures, was adopted (1) to avoid solvent deuterium effects on reaction rates and (2) to avoid exchange of carbon-bound hydrogen atoms. Cleavage of the amide bond of Gly-Gly to Gly is indicated by the appearance of the proton resonance at 3.4 ppm of Gly, which grows over time. The identity of the product was confirmed by the detection of peaks due to the [(L)Zn(Gly)]+ cation by ESI-MS (+ ion). The concentration of this hydrolysis product after 1, 3 and 5 days was determined from the integrated resonances of the glycine CH2 protons and aromatic protons of the ligand L (with and without pyrazine as an internal standard). The concentration of Gly estimated in this way was used to determine the percentage of Gly-Gly cleaved. Each hydrolysis experiment was repeated at least three times. The pH of the solutions was checked periodically and remained constant throughout the hydrolysis reactions (± 0.2 pH units).

## X-ray Crystallography.

Crystals suitable for X-ray diffraction studies were grown by slow evaporation of water/methanol solutions at room temperature.

Intensity data for [(LH+)2Zn2(Gly-Gly)2](ClO4)4·2H2O **1**·(ClO4)4·2H2O and [(LH+)Zn(Gly)](ClO4)2 **2**·(ClO4)2 were collected at 150 K using a Bruker-AXS SMART APEX area detector diffractometer with graphite-monochromated Mo K radiation ( = 0.71073 Å). The structures were solved by direct methods and refined to convergence against *F*2 data using the SHELXTL suite of programs.3 Data were corrected for absorption applying empirical methods using the program SADABS,4 and the structures were checked for higher symmetry using the program PLATON.5 All non-hydrogen atoms were refined anisotropically unless otherwise noted. Hydrogen atoms were placed in idealized positions and refined using a riding model with fixed isotropic displacement parameters. The N-H hydrogens were located in the difference map and refined isotropically. One of the ClO4¯ anions and one of the water molecules of **1** was disordered and modeled over two positions with 60% and 40% occupancy.

## References

1. W. L. F.Armarego and D. D. Perrin, *Purification of Laboratory Chemicals*, 4th Ed., Oxford: Butterworth-Heinemann, 1997.
2. J. C. Mareque Rivas, E. Salvagni, R. Torres Martín de Rosales and S. Parsons, *Dalton Trans*., 2003, 3339.
3. SHELXS and SHELXL 97, G. M. Sheldrick, University of Göttingen, 1997.
4. (a) G.M. Sheldrick, *SADABS*, Empirical absorption correction program, University of Göttingen, 1995, based upon the method of Blessing;4b (b) R. H. Blessing, *Acta Crystallogr., Sect. A,* 1995, **51**, 33.
5. A. L. Spek, *PLATON*, *Acta Crystallogr., Sect. A*. 1990, **46**, C-34.
